# Supplementary material for: Effect of acid-leaching on carbon-supported copper phthalocyanine tetrasulfonic acid tetrasodium salt (CuTSPc/C) for oxygen reduction reaction in alkaline electrolyte: active site studies
Source: Royal Society of Chemistry journal article supplement (doi:10.1039/c5ra06314k), 2015-01-01
Supplement: c5ra06314k1.pdf [file c5ra06314k1.pdf]

## Supporting information

### **Effect of Acid-leaching on Carbon-supported Copper Phthalocyanine Tetrasulfonic Acid Tetrasodium Salt (CuTSPc/C) for Oxygen Reduction Reaction in Alkaline Electrolyte: the active site studies**

Qing Zhang, Taishan Zhu, Xin Qing, Jinli Qiao, Shuhui Sun

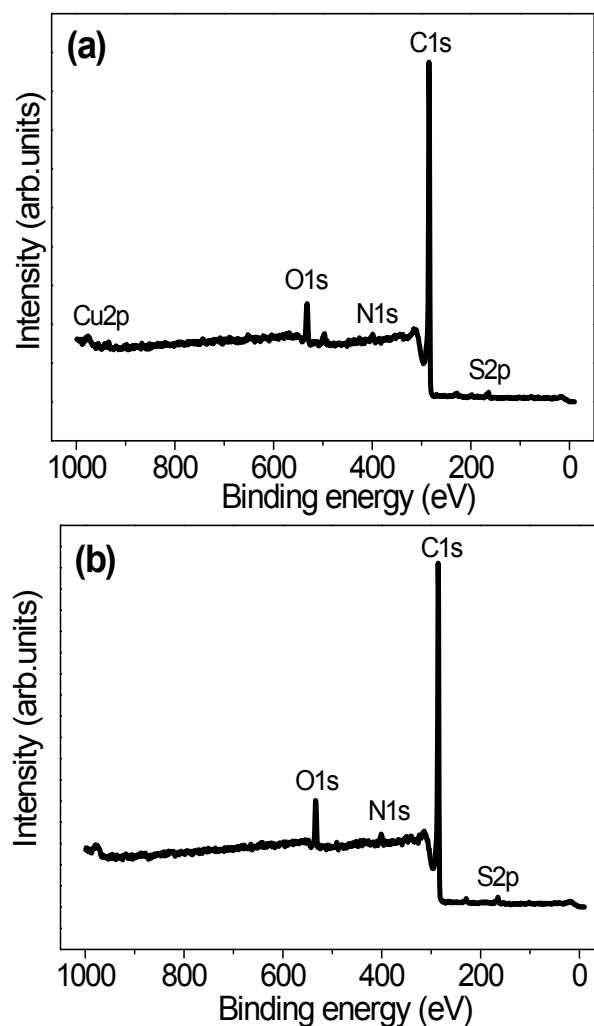

**Figure S1.** XPS spectra of full-spectrum for (a) (CuTSPc/C)<sub>700</sub> and (b) (CuTSPc/C)<sub>700</sub>AL.

Figure S1 shows the full-spectrum XPS analysis. The emissions from C1s, N1s, O1s and S2p levels that constitute the molecules for both (CuTSPc/C)<sub>700</sub> and (CuTSPc/C)<sub>700</sub>AL were clearly observed. The element of Cu that constitutes the molecules of (CuTSPc/C)<sub>700</sub> was also clearly identified (see Fig. S1a). However, the peaks of Cu2p were not found after acid-leaching, and the content of Cu is too small to be detected.
